# Supplementary material for: Efficient and unique cobarcoding of second-generation sequencing reads from long DNA molecules enabling cost-effective and accurate sequencing, haplotyping, and de novo assembly
Source: HighWire-hosted journal article supplement (doi:10.1101/gr.245126.118), 2019-04-02
Supplement: Supplemental_Tables_S1-5.xlsx [file Supplemental_Tables_S1-5.xlsx]

## Sheet: Supp Table S1
	stLFR (1 ng)	stLFR (10 ng)	Chromium	Illumina Bead Haplotyping	LFR	Best performing method in each category
Barcode library	3.6 × 109	3.6 × 109	4.7 × 106	1.5 × 105	384	stLFR
Compartmentalization	~3 uM beads	~3 uM beads	Oil water micro droplets	~3 uM beads	384 well plate	stLFR
Barcodes added to sample	5.0 × 107	3.0 × 107	3 × 106	1.5 × 105	384	stLFR
Barcodes labelling fragments	1.0 × 107	3.0 × 107	1.5 × 106	1.5 × 105	384	stLFR (10 ng)
DNA input (ng)	1	10	1	3	0.1	LFR
Sub-fragment amplification	Original DNA molecule barcoded and sub-fragmented, amplification occurs after barcoding	Original DNA molecule barcoded and sub-fragmented, amplification occurs after barcoding	A copy of original DNA is barcoded, then additional amplification is performed after barcoding	Original DNA molecule barcoded and sub-fragmented, amplification occurs after barcoding	Original DNA molecules are copied, fragmented, then barcoded, additional amplification is performed after barcoding	stLFR/Illumina Bead Haplotyping
Sub-fragment overlap	Clones created at transposon insertion step. Both top and bottom strands can be captured and there is a 9 base overlap between adjacent sub-fragments	Clones created at transposon insertion step. Both top and bottom strands can be captured and there is a 9 base overlap between adjacent sub-fragments	Random priming creates overlapping fragments	Clones created at transposon insertion step. Both top and bottom strands can be captured and there is a 9 base overlap between adjacent sub-fragments	Random priming creates overlapping fragments	10X Genomics/LFR
Coverage per long DNA molecule	up to ~0.2	~0.08	'up to ~0.2	~0.01	~1X	LFR
Average number of DNA molecules sharing a barcode	~1	~3	~8	~100	~3000	stLFR (1 ng)
Requried equipment	Standard molecular biology lab equipment	Standard molecular biology lab equipment	Specialized emulsion generating instrument	Standard molecular biology lab equipment	Standard molecular biology lab equipment	stLFR/Illumina Bead Haplotyping/LFR
Supplementary Table S1. Comparisons of stLFR to other co-barcoding technologies. These numbers are based on roughly 30-60X total sequence coverage, higher sequencing coverage would, in most cases, change the "coverage per long DNA molecule".

## Sheet: Supp Table S2
Library	stLFR-1						stLFR-2				stLFR-3	stLFR-4	BGISEQ-500 STD	BGISEQ-500 STD		BGISEQ-500 PCR-free STD
LaneID	CL200047468_L01	CL200047468_L02	CL200047469_L01	CL200047469_L02	CL100050451_L01	CL100050451_L02	CL100050450_L01	CL100050450_L02	CL100050407_L01	CL100050407_L02	CL100066605_L02	CL100063487_L02	CL100027091_L01	CL100063145_L01	CL100063145_L02	CL100063143_L01	CL100063143_L02
DNA source	GM12878	GM12878	GM12878	GM12878	GM12878	GM12878	GM12878	GM12878	GM12878	GM12878	GM12878	GM12878	RM8398	GM12878	GM12878	GM12878	GM12878
CycleNumber	254	254	254	254	254	254	254	254	254	254	254	254	200	200	200	200	200
ChipProductivity%	67.28	69.29	69.21	68.27	53.98	57.09	61.14	56.13	62.21	62.31	62.78	67.75	70.4	79.29	77.9	83.89	82.63
ImageArea	737	737	737	737	1632	1632	1632	1632	1632	1632	1632	1632	1632	737	737	737	737
Q30%	79.18	79.42	79.53	79.74	78.2	78.67	79.43	78.85	81.5	81.07	79.01	80.3	84.28	88.31	88.86	87.94	87.81
Lag1%	0.08	0.08	0.08	0.08	0.07	0.07	0.07	0.06	0.07	0.07	0.07	0.07	0.06	0.07	0.07	0.08	0.08
Lag2%	0.04	0.04	0.04	0.05	0.05	0.05	0.05	0.05	0.04	0.04	0.05	0.05	0.12	0.13	0.12	0.13	0.14
Runon1%	0.11	0.11	0.09	0.09	0.06	0.06	0.06	0.06	0.06	0.06	0.09	0.09	0.08	0.08	0.08	0.08	0.08
Runon2%	0.04	0.04	0.04	0.04	0.04	0.04	0.04	0.04	0.04	0.04	0.04	0.05	0.09	0.1	0.1	0.1	0.11
ESR%	67.56	69.29	69.4	68.36	54.62	58.01	62.25	57.15	62.67	62.77	64.08	68.63	71.01	79.29	78.86	83.89	82.63
MaxOffsetX	25.34	26.17	21.32	22.05	32.29	30.38	21.51	26.67	23.66	41.44	26.44	8.28	12.86	16.04	17.62	11.91	13.22
MaxOffsetY	28.04	33.32	13.88	13.11	59.23	63.1	19.63	26.32	34.06	40.78	18.39	10.15	22.62	11.66	7	10.49	18.51
InitialOffsetX	-16.84	-38.4	-56.58	-94.16	35.67	15.02	16.39	-8.16	17.67	-0.62	25.25	-53.31	48.15	-83.72	-118.9	-92.98	-79.26
InitialOffsetY	-7.25	-4.77	25.37	70.51	-35.5	-10.99	-50.03	-35.87	-5.68	-32.02	-43.09	-22.08	15.45	6.52	14.14	-28.47	5.19
InitialSignal	110911646931272	113211797061311	121211707121336	119211567011323	9289665811097	9449715881131	120211377191355	115511337161299	123811087221312	119310817011269	164911799311642	94513019461160	148915199251392	127211127171081	125611037131072	142711708961047	140211578881020
ForSignal(5_35)%	96,99,101,98	95,99,100,98	93,97,98,97	93,98,99,97	95,94,102,97	95,95,101,97	97100106100	98101107100	92,96,101,94	93,97,101,95	89,93,95,93	88,97,90,84	148,103,98,100	96,100,99,99	94,97,97,98	94,97,97,98	94,97,97,97
RevSignal(5_35)%	81,102,101,92	79,102,101,92	82,103,101,88	83,104,102,88	77,122,115,88	79,121,114,89	78,117,113,83	78,121,114,85	77,110,104,85	77,112,105,85	73,97,93,80	77,107,101,85	86,91,90,94	99103101105	97,101,99,104	93,96,93,98	94,95,93,99
InitialFIT%	89.78	91.27	91.21	90.72	74.84	81.23	81.3	73.6	91.89	92.31	73.92	94.45	64.31	84.84	85.5	91.16	87.88
ForFIT(5_35)%	97.49	98.06	97.43	98.07	99.42	98.63	98.1	98.42	98.94	98.7	99.79	96.3	103.39	97.85	96.78	98.47	98.39
RevFIT(5_35)%	100.59	99.43	100.44	100.35	97.03	97.85	98.7	98.19	98.27	97.64	102.47	99.72	99.58	99.24	98.89	97.19	97.03
ReadNum	283199275	291663605	291673103	287710655	504272308	533306568	571918355	525145087	581894141	582764272	586878286	628692553	660113386	331748328	325887160	353181541	347825522
BaseNum	71932615850	74082555670	74084968162	73078506370	128085166232	135459868272	145267262170	133386852098	147801111814	148022125088	149067084644	159687908462	132022677200	66349665600	65177432000	70636308200	69565104400
N_Count%	0.18	0.2	0.16	0.16	0.53	0.54	0.55	0.61	0.2	0.22	0.31	0.18	0.06	0.05	0.13	0.04	0.06
GC%	43.2	43.14	43.23	43.25	43.13	43.09	43.02	43.05	42.56	42.51	42.52	43.79	40.64	40.92	41.01	41.04	40.98
Q10%	96.84	96.82	96.92	96.97	96.12	96.24	96.36	96.22	97.15	97.06	96.69	96.94	98.67	99.29	99.24	99.15	99.13
Q20%	90.75	90.79	90.94	91.07	89.74	90.06	90.49	90.13	91.86	91.62	90.63	90.97	94.68	96.64	96.77	96.29	96.22
Q30%	79.18	79.42	79.53	79.74	78.2	78.67	79.43	78.85	81.5	81.07	79.01	80.3	84.28	88.31	88.86	87.94	87.81
EstErr%	0.96	0.98	0.94	0.92	1.33	1.31	1.28	1.35	0.88	0.92	1.07	0.93	0.55	0.34	0.41	0.38	0.4
Supplemental Table S2. Sequencing performance metrics from BGISEQ-500 instrument. A detailed description of each field can be found below.
LaneID: There is a certain chip ID for each BGISEQ-500 sequencing chip, started with ‘CL’ and followed by 9-digit number, for example CL200047469. Each chip has two lanes, named L01 and L02 respectively. For better description of sequencing lanes, chip ID and lane name were combined as LaneID, for example CL200047469_L01, means that this data from the lane1 of chip CL200047469.
DNA source: This tells the sequencing machine which kind of species is now sequenced and for some species such as Homo sapiens, the sequencing machine could apply the right reference to do alignment automatically. And the default value of this metric is Null.
CycleNumber: Total sequencing cycle number. One sequencing cycle equals to one base in sequencing read length.
ChipProductivity%: Flow cell chip productivity, ChipProductivity%= Effective FOVs (Field Of View) * ESR (Effective Spot Rate, see below)/Total FOVs (Field Of View).
ImageArea: Number of Field Of View imaged in this specific sequencing run.
Q30%: The percentage of bases with an error rate below 0.001 (accuracy above 99.9%).
Lag1%: During the sequencing reaction, theoretically the read DNA strands on a DNB extends by one base per cycle. Lag and Runon record the read strands being out of phase with the current cycle. Lag indicates one base short. Lag1% metric tells the percentage of Lag bases in Read 1.
Lag2%: During the sequencing reaction, theoretically the read DNA strands on a DNB extends by one base per cycle. Lag and Runon record the read strands being out of phase with the current cycle. Lag indicates one base short. Lag2% metric tells the percentage of Lag bases in Read 2.
Runon1%: During the sequencing reaction, theoretically the read DNA strands on a DNB extends by one base per cycle. Lag and Runon record the read strands being out of phase with the current cycle. Runon indicates one base ahead. Runon1% metric tells the percentage of Runon bases in Read 1.
Runon2%: During the sequencing reaction, theoretically the read DNA strands on a DNB extends by one base per cycle. Lag and Runon record the read strands being out of phase with the current cycle. Runon indicates one base ahead. Runon1% metric tells the percentage of Runon bases in Read 2.
ESR%: Effective Spot Rate，the percentage of filtered Reads among the DNBs recognized by Basecalling. ESR = (Total Reads/theoretical maximum reads number of one sequencing lane) ×100%.
MaxOffsetX: The offset values in the X and Y directions of each cycle of each FOV with regards to the first cycle. For each cycle, the average of offsets of all FOVs represent the offset value of this cycle. MaxOffsetX metric tells the largest average offset of all FOVs in all sequencing cycles in X axis.
MaxOffsetY: The offset values in the X and Y directions of each cycle of each FOV with regards to the first cycle. For each cycle, the average of offsets of all FOVs represent the offset value of this cycle. MaxOffsetY metric tells the largest average offset of all FOVs in all sequencing cycles in Y axis.
InitialOffsetX: The average offset of all FOVs in A channel in the first cycle in the X directions with regards to the flow cell template design.
InitialOffsetY: The average offset of all FOVs in A channel in the first cycle in the Y directions with regards to the flow cell template design.
InitialSignal: The average signal intensity of the first sequencing cycle.
ForSignal(5_35)%: ForSignal(5_35)% = average signal intensity of sequencing cycle 35 of Read1/ average signal intensity of sequencing cycle 5 of Read1*100%.
RevSignal(5_35)%: RevSignal(5_35)% = average signal intensity of sequencing cycle 35 of Read2/ average signal intensity of sequencing cycle 5 of Read2*100%.
InitialFIT%: FIT value represents the distribution of differences between signal and noise for each base. The FIT value is higher when the distribution of differences between signal to noise for each channel/color are more concentrated. IntialFIT% is the average FIT value of the first sequencing cycle.
ForFIT(5_35)%: ForFIT(5_35)% = average FIT value of sequencing cycle 35 of Read1/ average FIT value of sequencing cycle 5 of Read1*100%.
RevFIT(5_35)%: RevFIT(5_35)% = average FIT value of sequencing cycle 35 of Read2/ average FIT value of sequencing cycle 5 of Read2*100%.
ReadNum: The number of DNBs recognized by the Basecall software.
BaseNum: The number of bases recognized by the Basecall software.
N_Count%: N_Count%=Total number of bases which cannot be recognized by the Basecall software/ The number of bases recognized by the Basecall software*100%,
GC%: GC% = (Total count of G bases + Total count of C bases)/total base number in this sequencing lane*100%
Q10%: The percentage of bases with an error rate below 0.1 (accuracy above 90%).
Q20%: The percentage of bases with an error rate below 0.01 (accuracy above 99%).
Q30%: The percentage of bases with an error rate below 0.001 (accuracy above 99.9%).
EstErr%: Estimated error rate, which means, for each cycle base, estimating the average error rate for each cycle based on the Phred score calculation formula and the current quality value.

## Sheet: Supp Table S3
			GM12878	GM24385	GM24149	GM24143	GM24631
	Library statistics	Total bases sequenced (Gb)	118	252	290	254	248
		Input genomic DNA (ng)	10ng	1ng	1ng	1ng	1ng
		DNA source	GM12878	GM24385	GM24149	GM24143	GM24631
		Average genomic fragment size (kb)	30.6	68.8	87.4	81	76.6
		Unique genome coverage	37X	44X	43X	42X	44X
		Duplicate rate	0.0597	0.4084	0.4232	0.3503	0.408
		Read length	PE100	PE100	PE100	PE100	PE100
		Unique compartments	21527917	11827586	9982242	10376621	10906853
		Average fragments per compartment	8.05	1.14	1.22	1.14	1.13
		Average co-barcoded reads per fragment	11.0749	71.1422	93.2822	78.1011	78.7851
SNP	No Filter	TP calls	3191044	3024587	2989602	3015836	3021785
		FP calls	8271	8617	9035	7795	8128
		FN calls	19213	24287	23564	24738	21613
		Precision	0.9974	0.9972	0.997	0.9974	0.9973
		Sensitivity	0.994	0.992	0.9922	0.9919	0.9929
	Filtered	TP calls	3190760	3024178	2989155	3015467	3021473
		FP calls	4660	2844	3015	2883	2791
		FN calls	19497	24696	24011	25107	21925
		Precision	0.9985	0.9991	0.999	0.999	0.9991
		Sensitivity	0.9939	0.9919	0.992	0.9917	0.9928
Indel	No Filter	TP calls	459589	442233	435161	443448	375593
		FP calls	17671	21813	23040	22468	12020
		FN calls	21676	21989	23974	23445	13802
		Precision	0.963	0.953	0.9497	0.9518	0.969
		Sensitivity	0.955	0.9526	0.9478	0.9498	0.9646
	Filtered	TP calls	458008	440930	433447	441801	374800
		FP calls	8092	7349	7914	8071	5145
		FN calls	23257	23292	25688	25091	14595
		Precision	0.9826	0.9836	0.9821	0.9821	0.9865
		Sensitivity	0.9517	0.9498	0.9441	0.9463	0.9625
	Long Hap	% SNPs Phased	0.9861	0.9968	0.9968	0.9971	0.9969
		Contig N50(Mb)	1.23	39.09	55.93	53.75	58.52
		Short switch	0.0032	0.0015	0.0027	0.0026	0.0078
		Long switch	0.0022	0.0004	0.0014	0.0014	0.0015
Supplemental Table S3. Statistics for filter training libraries.

## Sheet: Supp Table S4
			stLFR-1			stLFR-2			stLFR-3	stLFR-4	Chromium	Illumina Bead Haplotyping
		Total bases sequenced (Gb)	336	230	100	660	200	100	117	126	128	99
LongHap	VCF generated from own library	% SNPs Phased	0.997	0.997	0.995	0.991	0.997	0.995	0.988	0.987	-	-
		Contig N50(Mb)	34	31	14.4	11.7	7.8	4.3	1.2	2.1	-	-
		Short switch	0.0022	0.0022	0.0023	0.0023	0.0022	0.0024	0.0029	0.0034	-	-
		Long switch	0.0018	0.0018	0.002	0.0017	0.0018	0.0018	0.002	0.0022	-	-
HapCut2	GIAB VCF	% SNPs Phased	0.998982	0.998911	0.998236	0.998945	0.997197	0.997197	0.988825	0.987	0.999118	-
		Contig N50(Mb)	15.1219	12.8801	8.61586	6.43307	4.16473	2.61684	0.622751	1.15	12.8	-
		Short switch	0.00272633	0.00272444	0.00272197	0.0026127	0.00272374	0.00271022	0.00272025	0.00571284	0.00273382	-
		Long switch	0.00570886	0.00571005	0.00569933	0.00552806	0.00569902	0.00569706	0.00573884	0.00275517	0.0057155	-
H-BOP1	Reference VCF from Amini et al.2	% SNPs Phased	-	-	-	-	-	-	-	-	-	0.98
		Contig N50(Mb)	-	-	-	-	-	-	-	-	-	1.14
		Short switch	-	-	-	-	-	-	-	-	-	0.0013
		Long switch	-	-	-	-	-	-	-	-	-	8.5e-05
Supplemental Table S4. Phasing comparisons. Performance metrics for various libraries are shown. For comparison purposes data from a Chromium library processed with HapCut2 and data from the Illumina Bead Haplotyping paper are shown. 1H-BOP is the software package used in the Zhang et al. manuscript. 2The Zhang et al. study used a VCF generated in a previous study by Amini et al.

## Sheet: Supp Table S5
Assembly	stLFR-1	stLFR-2	Chromium	Nanopore
# contigs (>= 0 bp)	18102	18905	17016	2337
# contigs (>= 1000 bp)	18102	18905	17016	2337
# contigs (>= 5000 bp)	6634	6559	4377	2327
# contigs (>= 10000 bp)	3179	2616	2013	2269
# contigs (>= 25000 bp)	965	948	697	1819
# contigs (>= 50000 bp)	500	500	351	1332
Total length (>= 0 bp)	2899386838	2893558199	2867683417	2866880913
Total length (>= 1000 bp)	2899386838	2893558199	2867683417	2866880913
Total length (>= 5000 bp)	2873181088	2864878932	2840566646	2866839233
Total length (>= 10000 bp)	2848642889	2836789635	2824111036	2866386869
Total length (>= 25000 bp)	2816263478	2812836296	2804290035	2858326432
Total length (>= 50000 bp)	2800220687	2797538549	2792294955	2840893649
# contigs	3179	2616	2013	2269
Largest contig	104958599	86747726	109375584	50410306
Total length	2848642889	2836789635	2824111036	2866386869
Reference length	3099922541	3099922541	3099922541	3099922541
GC (%)	40.88	40.82	40.84	40.86
Reference GC (%)	40.87	40.87	40.87	40.87
N50	28877588	26308501	45263628	7667013
NG50	23706054	25153794	39319759	7048393
N75	13786581	12765283	23731267	3419081
NG75	10364248	8968771	16287035	2381282
L50	30	31	20	99
LG50	35	37	24	115
L75	66	68	42	238
LG75	81	86	53	300
# misassemblies	4096	3824	2750	6938
# misassembled contigs	731	673	410	897
Misassembled contigs length	2767603369	2753275776	2768277060	2707303799
# local misassemblies	7175	6607	8283	49905
# scaffold gap ext. mis.	7080	8001	2464	0
# scaffold gap loc. mis.	24622	24819	7930	0
# unaligned mis. contigs	96	90	95	832
# unaligned contigs	29 + 468 part	37 + 438 part	23 + 327 part	59 + 1986 part
Unaligned length	7172962	6888121	6751928	72379934
Genome fraction (%)	92.976	92.628	93.776	94.611
Duplication ratio	1.041	1.041	1.024	1.006
# N's per 100 kbp	3039.36	2852.41	1085.71	0
# mismatches per 100 kbp	106.08	105.01	104.98	168
# indels per 100 kbp	25.64	25.56	28.32	165.25
Largest alignment	10614129	9113736	16615675	6837121
Total aligned length	2753741892	2747882498	2785982176	2790353276
NA50	1863160	1983491	2863578	906345
NGA50	1672208	1760512	2554487	807519
NA75	855494	980191	1388807	442568
NGA75	618475	672737	993815	338106
LA50	426	417	287	847
LGA50	498	487	338	984
LA75	981	920	642	1988
LGA75	1236	1164	818	2441
Supplemental Table S5. QUAST analysis of de novo assemblies. de novo assemblies from stLFR-1, stLFR-2, a Chromium library (Zheng et al.), and a nanopore library (Jain et al.) were evaluated using QUAST (Gurevich et al.). Detailed descriptions of the output fields can be found within the QUAST manuscript.
